# Supplementary material for: Spare the rod, spoil the child: measurement and learning from an intervention to shift corporal punishment attitudes and behaviors in Grenada, West Indies
Source: Frontiers journal article supplement (doi:10.3389/fpubh.2023.1127687), 2023-08-29
Supplement: Image_1.pdf [file Image_1.pdf]

## Appendix A: Original Attitudes Towards Corporal Punishment Scale

---

1. What methods do you currently use to get your child to behave?

- a. \_\_\_\_\_
- b. \_\_\_\_\_
- c. \_\_\_\_\_
- d. \_\_\_\_\_
- e. \_\_\_\_\_

2. Which of the listed methods has the most effect on your child's behaviour?

\_\_\_\_\_

3. Have you ever smacked/beaten your child? Yes ☐ No ☐

3a. If *yes*, how recently? Last week ☐ Last month ☐ Last 6 months ☐ Last year ☐

4. Please indicate in which circumstances, if any, you have smacked/beaten your child or children in the past year.

- a. \_\_\_\_\_
- b. \_\_\_\_\_
- c. \_\_\_\_\_
- d. \_\_\_\_\_

5. From this list, which of the following statements comes closest to your personal opinion about smacking/beating your child or children?

- a. I think it is always wrong to smack/beat a child, and I won't do it
- b. I don't like the idea of smacking/beating a child, but I will do it if nothing else works
- c. I'm comfortable with the idea of smacking/beating a child and will do it when I think it's necessary

d. I believe that if you spare the rod, you spoil the child

e. I don't know

6. Please rate how much you agree or disagree with each of the following statements using the scale provided below.

1 = Strongly agree, 2 = Tend to agree, 3 = Neither agree nor disagree,

4 = Tend to disagree, 5 = Strongly disagree

| Item                                                                                                | 1 | 2 | 3 | 4 | 5 |
|-----------------------------------------------------------------------------------------------------|---|---|---|---|---|
| 6a. Only bad parents smack/beat their children                                                      |   |   |   |   |   |
| 6b. Smacking/beating a child is as unacceptable as hitting an adult                                 |   |   |   |   |   |
| 6c. Smacking/beating is a good way of teaching children right from wrong                            |   |   |   |   |   |
| 6d. The law should allow parents to smack/beat their children                                       |   |   |   |   |   |
| 6e. There is a big difference between smacking/beating a child and physically abusing a child       |   |   |   |   |   |
| 6f. There should be a complete ban on parents smacking/beating their children, even as a punishment |   |   |   |   |   |
| 6g. It is sometimes necessary to smack/beat a naughty child                                         |   |   |   |   |   |

Please answer the following questions with a "yes" or "no" response.

| Item                                                                                                                      | Yes | No |
|---------------------------------------------------------------------------------------------------------------------------|-----|----|
| 7. Would you support a law that that made it illegal for parents to use corporal punishment to discipline their children? |     |    |
| 8. Should schools be allowed to use corporal punishment to discipline students?                                           |     |    |
| 9. Is corporal punishment an effective method of disciplining a child?                                                    |     |    |
| 10. Does corporal punishment lead to the development of good character?                                                   |     |    |
| 11. Does corporal punishment help build respect for authority figures?                                                    |     |    |
| 12. Does corporal punishment help children become successful adults?                                                      |     |    |
| 13. Does corporal punishment work better than other disciplinary methods that do not involve physical pain?               |     |    |
| 14. Do you consider yourself to be a religious person?                                                                    |     |    |

15.) What religion do you follow? \_\_\_\_\_ N/A ☐

*Scoring: There is no formal scoring for the ACP as yet.*

Groups were compared on individual items using appropriate analysis (e.g., chi square).
