# Supplementary material for: Spare the rod, spoil the child: measurement and learning from an intervention to shift corporal punishment attitudes and behaviors in Grenada, West Indies
Source: Frontiers journal article supplement (doi:10.3389/fpubh.2023.1127687), 2023-08-29
Supplement: Image_2.pdf [file Image_2.pdf]

## Appendix B: HOME-A Acceptance Subscale

---

**II. ACCEPTANCE.** This factor covers caregiver acceptance of less than optimal behavior from the child and the avoidance of undue restriction and punishment.

| Item                                                                                        | Yes | No |
|---------------------------------------------------------------------------------------------|-----|----|
| 12. No more than one instance of physical punishment during past week.                      |     |    |
| 13. Caregiver does not shout at child.                                                      |     |    |
| 14. Caregiver does not express overt annoyance with or hostility to child.                  |     |    |
| 15. Caregiver neither slaps nor spansks child during visit.                                 |     |    |
| 16. Caregiver does not scold or criticize child during visit.                               |     |    |
| 17. Caregiver does not interfere with or restrict child more than three times during visit. |     |    |
| 18. At least ten books are present and visible.                                             |     |    |

*Scoring: 1 = Yes; 0 = No. Total subscale scoring across all 7 items = 0-7.*

Group means were compared using appropriate analysis (t-test).
