# Supplementary material for: Spare the rod, spoil the child: measurement and learning from an intervention to shift corporal punishment attitudes and behaviors in Grenada, West Indies
Source: Frontiers journal article supplement (doi:10.3389/fpubh.2023.1127687), 2023-08-29
Supplement: Image_4.pdf [file Image_4.pdf]

**Appendix D: Quality Assurance Results for the ACP. Matrix of Original Items, Findings, Modifications, And Item Status.**

| Original item<br>(Response option)                                                                                                                                                                                                                                 | Findings from<br>Round 1                                                                                                                                                                                                                                                                             | Revised item<br>(Response option)                                                                                                                                                                                                                           | Findings<br>from Round<br>2                                                                                                                                                             | Status                                                                                                                                       |
|--------------------------------------------------------------------------------------------------------------------------------------------------------------------------------------------------------------------------------------------------------------------|------------------------------------------------------------------------------------------------------------------------------------------------------------------------------------------------------------------------------------------------------------------------------------------------------|-------------------------------------------------------------------------------------------------------------------------------------------------------------------------------------------------------------------------------------------------------------|-----------------------------------------------------------------------------------------------------------------------------------------------------------------------------------------|----------------------------------------------------------------------------------------------------------------------------------------------|
| Definitions and measurement of corporal punishment (behavior)                                                                                                                                                                                                      |                                                                                                                                                                                                                                                                                                      |                                                                                                                                                                                                                                                             |                                                                                                                                                                                         |                                                                                                                                              |
| What methods do you currently use to get your child to behave? (Open-ended response)                                                                                                                                                                               | <ul style="list-style-type: none"> <li>- "Currently" is not relevant</li> <li>- Corporal punishment is reactionary, so question should be about what is done when child misbehaves</li> </ul>                                                                                                        | What do you do when your child misbehaves? (Open-ended response)                                                                                                                                                                                            | <ul style="list-style-type: none"> <li>- Revision seems clear</li> <li>- There are "degrees" of severity to consider; not all misbehavior is same/warrants the same approach</li> </ul> | <ul style="list-style-type: none"> <li>- How will this item be scored?</li> <li>- Will this be an open-ended or close-ended item?</li> </ul> |
| <p>Have you ever smacked/beaten your child? (Yes/No)</p> <p>If yes, how recently? (Last week/Last month/Last 6 months/Last year)</p> <p>Please indicate in which circumstances, if any, you have smacked/beaten your child(ren) in the past year. (Open-ended)</p> | <ul style="list-style-type: none"> <li>- "Smack" and "beat" are different</li> <li>- Unclear how to answer if smacked but never beaten</li> <li>- This does not capture other forms of punishment</li> <li>- There is a difference between recency, frequency, and severity of punishment</li> </ul> | <p>Have you ever used any form of physical punishment with your child? (Yes/No)</p> <p>If yes, please describe. With hand? With object(s)?</p> <p>When was the last time you used physical punishment?</p> <p>How often do you use physical punishment?</p> | <ul style="list-style-type: none"> <li>- Revision seems clear, but participants do not always clearly answer each part of the question</li> </ul>                                       | <ul style="list-style-type: none"> <li>- How will this item be scored?</li> <li>- Will this be an open-ended or close-ended item?</li> </ul> |

|                                                                                                                                                           |                                                                                      |                                                                                                                                                                                    |                                                                                                                                |                                                                                      |
|-----------------------------------------------------------------------------------------------------------------------------------------------------------|--------------------------------------------------------------------------------------|------------------------------------------------------------------------------------------------------------------------------------------------------------------------------------|--------------------------------------------------------------------------------------------------------------------------------|--------------------------------------------------------------------------------------|
| There is a big difference between smacking/beating a child and physically abusing a child.<br>(Strongly Disagree/ Disagree/ Neutral/Agree/Strongly Agree) | - "Beating" could be seen as the same as "physical abuse", even if "smacking" is not | There is a big difference between using physical punishment and physically abusing a child.<br>(Strongly Disagree/ Disagree/ Neutral/Agree/Strongly Agree)                         | - Revision seems clear, though a few participants asked if "big" was necessary ("How to determine what is a big difference?" ) | - Item should be tested with and without "big"                                       |
| Restrictive question/item or response options                                                                                                             |                                                                                      |                                                                                                                                                                                    |                                                                                                                                |                                                                                      |
| Which of the listed methods (from previous question) has the most effect on your child's behavior?<br>(Open-ended response)                               | - It depends on the child (behavior, age, etc.) and parent                           | Which (of those mention in Q1) works best?<br>(Open-ended response)<br><br>Is this the one you usually use?<br>(Yes/No)<br><br>If no, which method do you usually use?<br>(Yes/No) | - Revision seems clear, but participants do not always clearly answer each part of the question                                | - How will this item be scored?<br>- Will this be an open-ended or close-ended item? |

|                                                                                                                                                                                                                                                                                                                                                                                                                                                                                                                                     |                                                                                                                        |                                                                                                                                                                                                                                                                                                                                                                                                                                                                                                  |                                                                                                                                                                                          |                                                                                                                                                              |
|-------------------------------------------------------------------------------------------------------------------------------------------------------------------------------------------------------------------------------------------------------------------------------------------------------------------------------------------------------------------------------------------------------------------------------------------------------------------------------------------------------------------------------------|------------------------------------------------------------------------------------------------------------------------|--------------------------------------------------------------------------------------------------------------------------------------------------------------------------------------------------------------------------------------------------------------------------------------------------------------------------------------------------------------------------------------------------------------------------------------------------------------------------------------------------|------------------------------------------------------------------------------------------------------------------------------------------------------------------------------------------|--------------------------------------------------------------------------------------------------------------------------------------------------------------|
| <p>From this list, which of the following statements comes closest to your personal opinion about smacking/beating your child or children?</p> <p>(a) I think it is always wrong to smack/beat a child, and I won't do it<br/> b) I don't like the idea of smacking/beating a child, but I will do it if nothing else works<br/> c) I'm comfortable with the idea of smacking/beating a child and will do it when I think it's necessary<br/> d) I believe that if you spare the rod, you spoil the child<br/> e) I don't know)</p> | <p>- Options are not mutually exclusive<br/> - Multiple statements apply</p>                                           | <p>From this list, which of the following statements comes closest to your personal opinion on using physical punishment on your child(ren)?</p> <p>(a) I think it is always wrong to use physical punishment on a child<br/> b) I don't like the idea of using physical punishment, but I will do it if nothing else works<br/> c) I'm comfortable with the idea of using physical punishment<br/> d) I believe that if you spare the rod, you spoil the child<br/> e) Refused, don't know)</p> | <p>- Options are still not mutually exclusive (Option B and D and C and D can co-exist)<br/> - "Spare the rod, spoil the child" does not necessarily mean severe corporal punishment</p> | <p>- How will this item be scored?<br/> - How do we resolve this so that the options are mutually exclusive?<br/> - Do we make each Option its own item?</p> |
| <p>Should schools be allowed to use corporal punishment to discipline children?<br/> (Yes/No)</p>                                                                                                                                                                                                                                                                                                                                                                                                                                   | <p>- General sense/purpose of the item seems clear<br/> - Participants are not always able to answer "yes" or "no"</p> | <p>Schools should be allowed to use physical punishment to discipline children.<br/> (Strongly Disagree/ Disagree/ Neutral/Agree/Strongly Agree)</p>                                                                                                                                                                                                                                                                                                                                             | <p>- Revision seems clear</p>                                                                                                                                                            | <p>- Item requires no further revision</p>                                                                                                                   |

|                                                                                 |                                                                                                                                                  |                                                                                                                                    |                                                                                                          |                                                                                                                                                                      |
|---------------------------------------------------------------------------------|--------------------------------------------------------------------------------------------------------------------------------------------------|------------------------------------------------------------------------------------------------------------------------------------|----------------------------------------------------------------------------------------------------------|----------------------------------------------------------------------------------------------------------------------------------------------------------------------|
| Is corporal punishment an effective method of disciplining a child?<br>(Yes/No) | - Participants are not always able to answer "yes" or "no", several answer with "it depends" or "sometimes"                                      | Physical punishment is an effective method of disciplining a child.<br>(Strongly Disagree/ Disagree/ Neutral/Agree/Strongly Agree) | - Revision seems clear, though item may not fully capture situation-dependent use of corporal punishment | - Possible addition of other items may be needed<br>- Possible need to explore alternative response options (never, rarely, half the time, most of the time, always) |
| Does corporal punishment lead to the development of good character?<br>(Yes/No) | - General sense/purpose of the item seems clear<br>- Participants are not always able to answer "yes" or "no"                                    | Physical punishment leads to the development of good character.<br>(Strongly Disagree/ Disagree/ Neutral/Agree/Strongly Agree)     | - Revision seems clear                                                                                   | - Item requires no further revision                                                                                                                                  |
| Does corporal punishment help build respect for authority figures?<br>(Yes/No)  | - General sense/purpose of the item seems clear<br>- Item considered "too general"<br>- Participants are not always able to answer "yes" or "no" | Physical punishment helps build respect for authority figures.<br>(Strongly Disagree/ Disagree/ Neutral/Agree/Strongly Agree)      | - Revision seems clear                                                                                   | - Item requires no further revision                                                                                                                                  |

|                                                                                                                      |                                                                                                                                                                                                                                                                                        |                                                                                                                                                                    |                                                                                                                                                                                                                                                                             |                                                                                               |
|----------------------------------------------------------------------------------------------------------------------|----------------------------------------------------------------------------------------------------------------------------------------------------------------------------------------------------------------------------------------------------------------------------------------|--------------------------------------------------------------------------------------------------------------------------------------------------------------------|-----------------------------------------------------------------------------------------------------------------------------------------------------------------------------------------------------------------------------------------------------------------------------|-----------------------------------------------------------------------------------------------|
| Does corporal punishment help children become successful adults?<br>(Yes/No)                                         | <ul style="list-style-type: none"> <li>- General sense/purpose of the item seems clear</li> <li>- Definition of "success" may be unclear</li> <li>- Participants are not always able to answer "yes" or "no"</li> </ul>                                                                | Physical punishment helps children become successful adults<br>(Strongly Disagree/ Disagree/ Neutral/Agree/Strongly Agree)                                         | <ul style="list-style-type: none"> <li>- Revision seems clear, though definition of "successful adults" may still present an issue</li> </ul>                                                                                                                               | - Item would benefit from additional pre-testing                                              |
| Does corporal punishment work better than other disciplinary measures that do not involve physical pain?<br>(Yes/No) | <ul style="list-style-type: none"> <li>- General sense/purpose of the item seems clear</li> <li>- Participants are not always able to answer "yes" or "no"</li> </ul>                                                                                                                  | Physical punishment works better than other disciplinary measures that do not involve physical pain<br>(Strongly Disagree/ Disagree/ Neutral/Agree/Strongly Agree) | Item not tested in Round 2?                                                                                                                                                                                                                                                 | - Item requires no further revision                                                           |
| Theme: Item relationship with construct unclear                                                                      |                                                                                                                                                                                                                                                                                        |                                                                                                                                                                    |                                                                                                                                                                                                                                                                             |                                                                                               |
| Only bad parents smack/beat their children.<br>(Strongly Disagree/ Disagree/ Neutral/Agree/Strongly Agree)           | <ul style="list-style-type: none"> <li>- Most participants disagree with this statement, noting that corporal punishment can be a sign of good parenting, and bad parenting can take multiple forms</li> <li>- There is some confusion about what is meant by "bad parents"</li> </ul> | Only bad parents use physical punishment on their children.<br>(Strongly Disagree/ Disagree/ Neutral/Agree/Strongly Agree)                                         | <ul style="list-style-type: none"> <li>- Responses are similar to Round 1, and the item seems clear</li> <li>- It is not clear how participants are expected to respond in relation to attitudes towards corporal punishment (i.e., scoring could go either way)</li> </ul> | - Item was dropped due to the lack of a clear relationship between the item and the construct |

| Theme: Minor issues with terminology                                                                                                                                 |                                                                                                                                                                                                                                                                       |                                                                                                                                                                |                                                                                                                                                    |                                                                                                                                |
|----------------------------------------------------------------------------------------------------------------------------------------------------------------------|-----------------------------------------------------------------------------------------------------------------------------------------------------------------------------------------------------------------------------------------------------------------------|----------------------------------------------------------------------------------------------------------------------------------------------------------------|----------------------------------------------------------------------------------------------------------------------------------------------------|--------------------------------------------------------------------------------------------------------------------------------|
| Smacking/beating a child is as unacceptable as hitting an adult.<br>(Strongly Disagree/ Disagree/ Neutral/Agree/Strongly Strong Agree)                               | <ul style="list-style-type: none"> <li>- "Just as bad" used instead of "unacceptable" in practice</li> <li>- Smacking, beating, and hitting all different terms</li> </ul>                                                                                            | Using physical force on a child is the same as using physical force on an adult.<br>(Strongly Disagree/ Disagree/ Neutral/Agree/Strongly Strong Agree)         | <ul style="list-style-type: none"> <li>- "Physical force" is too strong a term</li> <li>- General sense/purpose of the item seems clear</li> </ul> | <ul style="list-style-type: none"> <li>- An alternative term for "physical force" needs to be identified and tested</li> </ul> |
| The law should allow parents to smack/beat their children.<br>(Strongly Disagree/ Disagree/ Neutral/Agree/Strongly Strong Agree)                                     | <ul style="list-style-type: none"> <li>- Some confusion about what is meant by "the law"</li> <li>- Some confusion with what this would look like in practice</li> <li>- A few participants selected "neutral" but provided an explanation of disagreement</li> </ul> | Item was dropped for Round 2 due to overlap with other items and minor issues identified in Round 1                                                            | N/A                                                                                                                                                | N/A                                                                                                                            |
| There should be a complete ban on parents smacking/beating their children, even as punishment.<br>(Strongly Disagree/ Disagree/ Neutral/Agree/Strongly Strong Agree) | <ul style="list-style-type: none"> <li>- Participants did not feel that the qualifier "even as punishment" was necessary</li> </ul>                                                                                                                                   | There should be a complete ban on parentings using physical punishment on their children<br>(Strongly Disagree/ Disagree/ Neutral/Agree/Strongly Strong Agree) | <ul style="list-style-type: none"> <li>- Revision seems clear</li> </ul>                                                                           | <ul style="list-style-type: none"> <li>- Item requires no further revision</li> </ul>                                          |

|                                                                                                                                |                                                                                                                   |                                                                                                                                          |                                                                                                                                                                                                                                            |                                                                                                                               |
|--------------------------------------------------------------------------------------------------------------------------------|-------------------------------------------------------------------------------------------------------------------|------------------------------------------------------------------------------------------------------------------------------------------|--------------------------------------------------------------------------------------------------------------------------------------------------------------------------------------------------------------------------------------------|-------------------------------------------------------------------------------------------------------------------------------|
| It is sometimes necessary to smack/beat a naughty child.<br>(Strongly Disagree/ Disagree/ Neutral/Agree/Strongly Strong Agree) | - "Naughty" not seen as necessary removed                                                                         | It is sometimes necessary to use physical punishment with a child.<br>(Strongly Disagree/ Disagree/ Neutral/Agree/Strongly Strong Agree) | - Revision seems clear                                                                                                                                                                                                                     | - Item requires no further revision                                                                                           |
| Would you support a law that made it illegal for parents to use corporal punishment to discipline their children?<br>(Yes/No)  | - It is not clear if this item is always understood<br>- Legal/illegal needs to be explained to some participants | Would you support a law that made it illegal for parents to use physical punishment to discipline their children?                        | - Most participants are able to answer "yes" or "no", though a couple responded "maybe" or did not provide an answer<br>- There were some qualifying statements to explain responses that might be lost with a single close-ended question | - Understanding of legal/illegal as part of this item will need to be tested in a population similar to the target population |
